# Supplementary material
Source: PubMed Central journal article supplement (PMC3595006)
Supplement: NIHMS86074-supplement-Supplementary_Table_1.pdf [file NIHMS86074-supplement-Supplementary_Table_1.pdf]

Supplemental

| <b>Table 1. DNA-PKcs kinase inhibition leads to an increase in telomere fusions only in the presence of Ligase IV</b> |                             |                     |                         |                                  |
|-----------------------------------------------------------------------------------------------------------------------|-----------------------------|---------------------|-------------------------|----------------------------------|
| <b>Cell Line (MEFs)</b>                                                                                               | <b>NU7026 Concentration</b> | <b>Cells Scored</b> | <b>Telomere Fusions</b> | <b>Telomere Fusions per cell</b> |
| p53 <sup>-/-</sup>                                                                                                    | 0 $\mu$ M                   | 10                  | 0                       | 0.0                              |
|                                                                                                                       | 55 $\mu$ M                  | 10                  | 16                      | 1.6                              |
| p53 <sup>-/-</sup> , LigIV <sup>-/-</sup>                                                                             | 0 $\mu$ M                   | 10                  | 0                       | 0.0                              |
|                                                                                                                       | 55 $\mu$ M                  | 10                  | 2                       | 0.2                              |
