# Supplementary material
Source: PubMed Central journal article supplement (PMC3595006)
Supplement: NIHMS86074-supplement-Supplmentary_Table_2.pdf [file NIHMS86074-supplement-Supplmentary_Table_2.pdf]

Supplemental

**Table 2.** Characteristics of Normal, Irradiated, and Growth Variant BALB/c mouse cells

|                                     | Non-Irradiated<br>Cells<br>(20 p.d.s) <sup>a</sup> | Irradiated<br>Cells<br>(20 p.d.s) | IRO<br>Cells<br>(passage 2) | 6-1<br>Cells<br>(passage 2)     | 6-2<br>Cells<br>(passage 2)                    |
|-------------------------------------|----------------------------------------------------|-----------------------------------|-----------------------------|---------------------------------|------------------------------------------------|
| Population Doubling Time            | 36 hrs                                             | 36 hrs                            | 24 hrs                      | 15 hrs                          | 18 hrs                                         |
| Ploidy                              | Diploid                                            | Diploid                           | Diploid                     | <u>Near<br/>Diploid</u><br>(44) | <u>Near Diploid<br/>Aneuploid</u><br>(44) (78) |
| Chromatid Aberrations/Cell          | 0.1                                                | 0.29                              | 0.22                        | 0.3                             | 0.1 0.2                                        |
| Chromatid<br>Aberrations/Chromosome | 0.0025                                             | 0.007                             | 0.006                       | 0.007                           | 0.002<br>0.0025                                |
| Total Aberrations/Cell              | 0.2                                                | 0.5                               | 0.4                         | 0.72                            | 0.3 0.7                                        |
| Total<br>Aberrations/Chromosome     | 0.005                                              | 0.013                             | 0.01                        | 0.016                           | 0.007 0.009                                    |
| Tumorigenicity                      | ND <sup>b</sup>                                    | No                                | No                          | Yes<br>(>passage<br>20)         | No                                             |

<sup>a</sup>Population Doublings

<sup>b</sup>Not Done
